# Supplementary material for: Discovery of a Cushing’s syndrome protein kinase A mutant that biases signaling through type I AKAPs
Source: PubMed Central journal article supplement (PMC10881042; doi:10.1126/sciadv.adl1258), 2024-02-21
Supplement: sciadv.adl1258_sm.pdf [file sciadv.adl1258_sm.pdf]

Supplementary Materials for  
**Discovery of a Cushing's syndrome protein kinase A mutant that biases  
signaling through type I AKAPs**

Mitchell H. Omar *et al.*

Corresponding author: John D. Scott, [scottjd@uw.edu](mailto:scottjd@uw.edu); Mitchell H. Omar, [momar@unr.edu](mailto:momar@unr.edu)

*Sci. Adv.* **10**, ead11258 (2024)  
DOI: 10.1126/sciadv.adl1258

**The PDF file includes:**

Figs. S1 to S4  
Legends for movies S1 to S4

**Other Supplementary Material for this manuscript includes the following:**

Movies S1 to S4

## SUPPLEMENTAL FIGURES

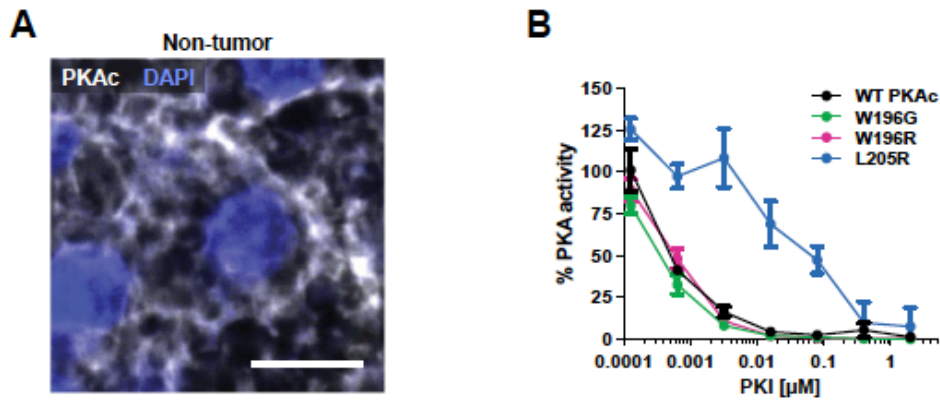

**Figure S1: Non-tumor patient tissue and PKI inhibition of Cushing's mutants**

(A) High magnification of tumor-adjacent adrenal tissue from a Cushing's syndrome patient stained for PKAc (white) and nuclei (DAPI, blue). Scale bar = 10  $\mu$ m.

(B) PKAc activity measurements (using Kemptide as a substrate) in the presence of the PKI<sub>5-24</sub> inhibitory peptide. Percent (%) kinase activity is monitored against concentration ( $\mu$ M) of PKI<sub>5-24</sub> inhibitory peptide. Mean  $\pm$  SD; n=4 independent replicates.

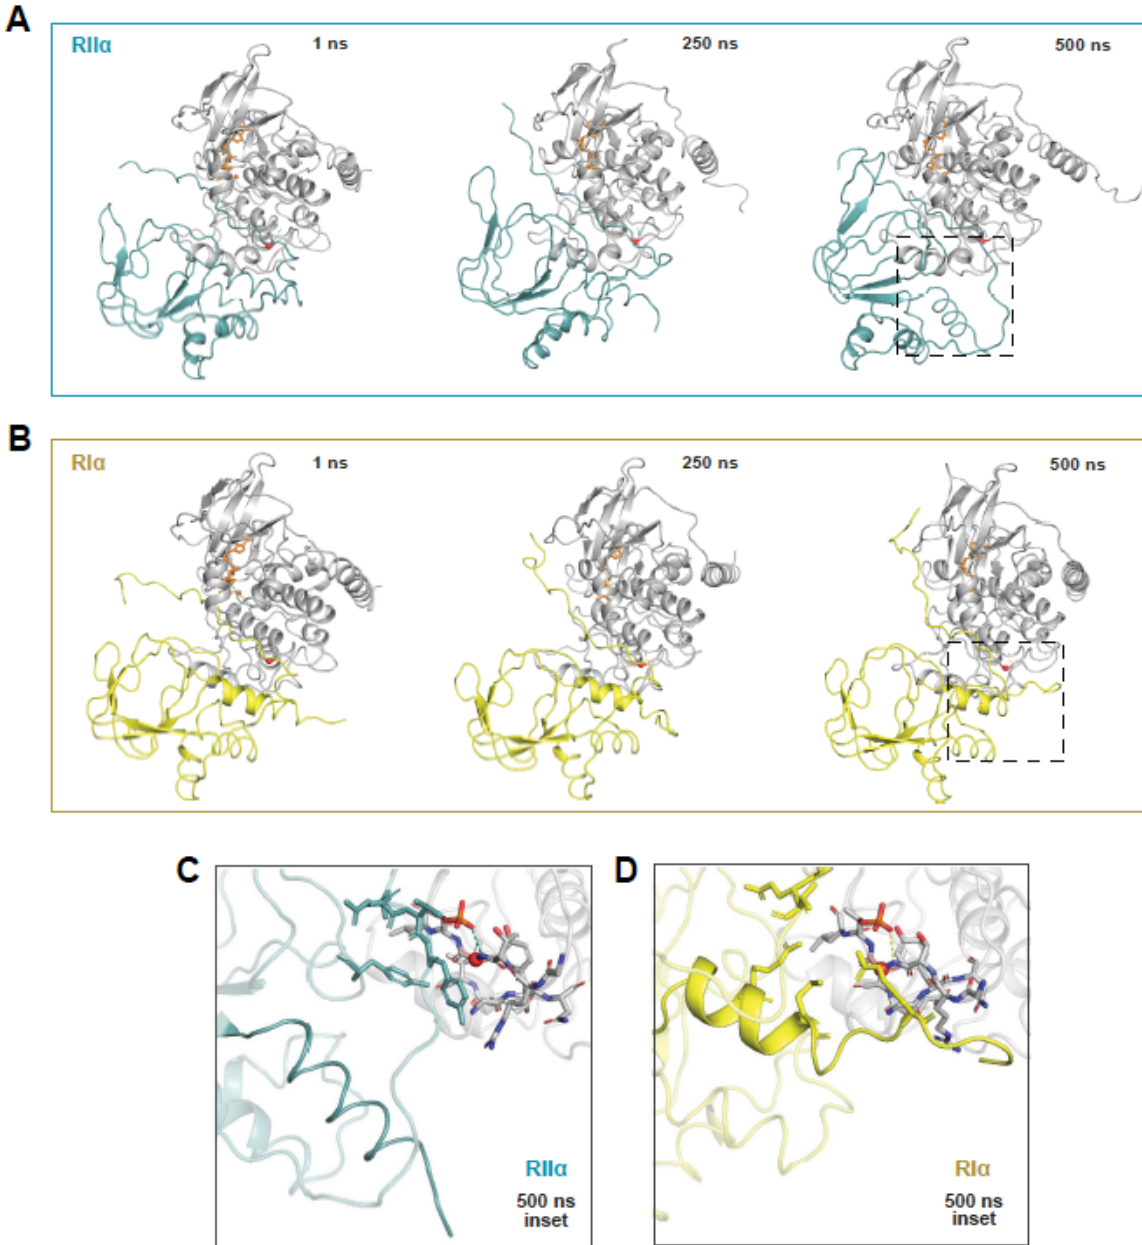

**Figure S2: In silico R:C structural analyses**

(A-B) Expanded and more detailed representations of the molecular simulation timecourses presented in figures 4D and 4E. Molecular dynamic timecourses of PKAc<sup>W196G</sup> (gray) in complex with (A) RII (cyan) and (B) RI (yellow). (C-D) Magnification of dashed box in S2A and S2B.

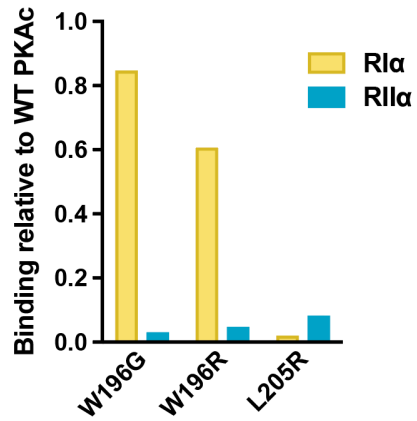

**Figure S3: HEK293-immunoprecipitated W196G and W196R prefer RI**

Quantification of RI $\alpha$  (yellow) and RII $\alpha$  (teal) PKA regulatory subunits co-precipitated from HEK293 cells by immunoprecipitated PKAc variants, as determined by LC-MS. Data presented as amount bound relative to WT PKAc.

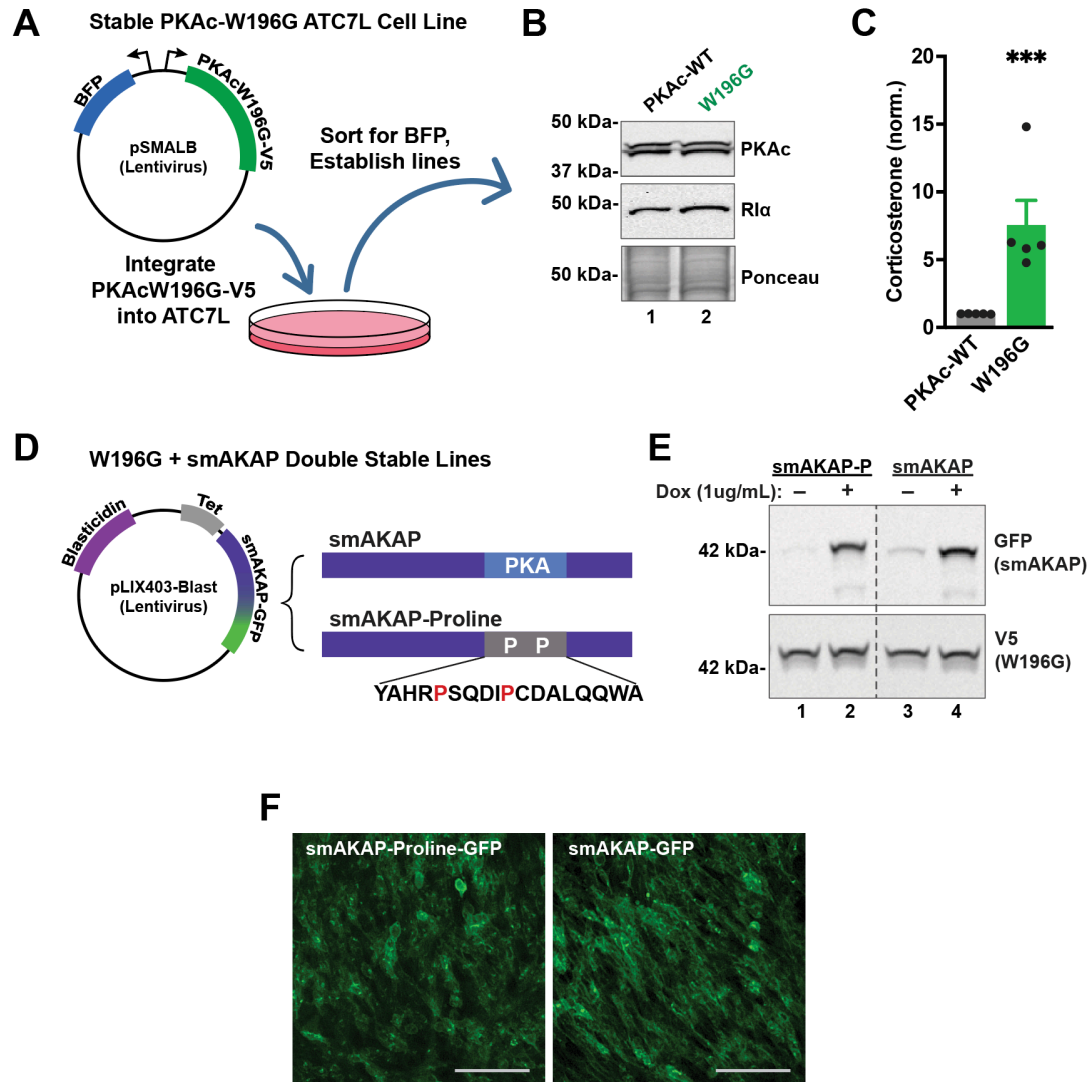

### Figure S4: Generation and validation of stable adrenal cell lines

- (A) Lentiviral WT PKAc-V5 or PKAc<sup>W196G</sup>-V5 plasmids were integrated into ATC7L adrenal cells. FACS cell sorting resulted in population lines stably expressing each kinase variant.
- (B) Immunoblot showing levels of PKA subunits expressed in stable lines. Doublet for PKAc shows V5-tagged viral construct (top band) and endogenous protein (lower band).
- (C) Corticosterone meas. from stable ATC7L cell lines. Mean ± SE; \*\*\*p ≤ 0.001, Student's t test.
- (D) Lentiviral plasmid and linear protein constructs for smAKAP and smAKAP-proline control used to make double stable PKAc<sup>W196G</sup>/smAKAP lines.
- (E) Immunoblot showing PKAc<sup>W196G</sup> expression and doxycycline-inducible expression of smAKAP constructs in double stable cell lines.
- (F) Low magnification image of GFP signal from tagged smAKAP proteins in double stable ATC7L cell lines. Scale bar = 100 μm.

## **SUPPLEMENTAL MOVIE LEGENDS**

**Supplemental movie 1.** H295R cells expressing AKAP79-YFP (cyan), RII $\alpha$ -iRFP, and WT PKAc tagged with photoactivatable mCherry (magenta). Sampled at 2 Hz, with 2 seconds of baseline and 13 seconds of recording after photoactivation.

**Supplemental movie 2.** H295R cells expressing AKAP79-YFP (cyan), RII $\alpha$ -iRFP, and PKAc-W196G tagged with photoactivatable mCherry (magenta). Sampled at 2 Hz, with 2 seconds of baseline and 13 seconds of recording after photoactivation.

**Supplemental movie 3.** H295R cells expressing smAKAP-GFP (yellow), RI $\alpha$ -iRFP, and WT PKAc tagged with photoactivatable mCherry (magenta). Sampled at 2 Hz, with 2 seconds of baseline and 13 seconds of recording after photoactivation.

**Supplemental movie 4.** H295R cells expressing smAKAP-GFP (yellow), RI $\alpha$ -iRFP, and PKAc-W196G tagged with photoactivatable mCherry (magenta). Sampled at 2 Hz, with 2 seconds of baseline and 13 seconds of recording after photoactivation.
